# Supplementary material
Source: Royal Society of Chemistry journal article supplement (doi:10.1039/d5en01094b)
Supplement: d5en01094b1.pdf [file d5en01094b1.pdf]

## Laser-Engineered Nanocomposite Electrode for Dual Hydrogen Generation and Sewage Wastewater Treatment

Mohammed Alebrahim<sup>1</sup>, Haider Ali<sup>2</sup>, Sobia Dilpazir<sup>2</sup>, Aasif Helal<sup>2</sup>, Mohd Yusuf Khan<sup>2</sup>,  
Abuzar Khan<sup>2\*</sup>

<sup>1</sup>Interdisciplinary Research Center for Sustainable Energy Systems (IRC-SES), King Fahd University of Petroleum & Minerals, Box 5040, Dhahran 31261, Saudi Arabia.

<sup>2</sup> Interdisciplinary Research Center for Hydrogen Technologies and Carbon Management (IRC-HTCM), King Fahd University of Petroleum & Minerals, Box 5040, Dhahran 31261, Saudi Arabia.

\*Corresponding author email: [abuzar@kfupm.edu.sa](mailto:abuzar@kfupm.edu.sa)

**Table S1: Composition of Sewage Water**

| SAMPLE ID  | Unit | LOR   | S2       |
|------------|------|-------|----------|
| Al 396.153 | ug/L | 10.0  | <10.0    |
| As 188.979 | ug/L | 10.0  | <10.0    |
| Ba 233.527 | ug/L | 10.0  | 52.4     |
| Ca 317.933 | ug/L | 50.0  | 138411.0 |
| Cd 214.440 | ug/L | 10.0  | <10.0    |
| Co 228.616 | ug/L | 10.0  | <10.0    |
| Cr 267.716 | ug/L | 10.0  | <10.0    |
| Cu 324.752 | ug/L | 10.0  | <10.0    |
| Fe 238.204 | ug/L | 10.0  | 72.6     |
| K 766.490  | ug/L | 50.0  | 168140.1 |
| Mg 285.213 | ug/L | 50.0  | 37586.3  |
| Mn 257.610 | ug/L | 10.0  | 26.1     |
| Na 589.592 | ug/L | 100.0 | 695920.0 |
| Ni 231.604 | ug/L | 10.0  | <10.0    |
| Pb 220.353 | ug/L | 10.0  | <10.0    |
| V 292.464  | ug/L | 10.0  | <10.0    |
| Zn 213.857 | ug/L | 10.0  | 74.9     |
| Hg         | ug/L | 0.5   | <0.5     |

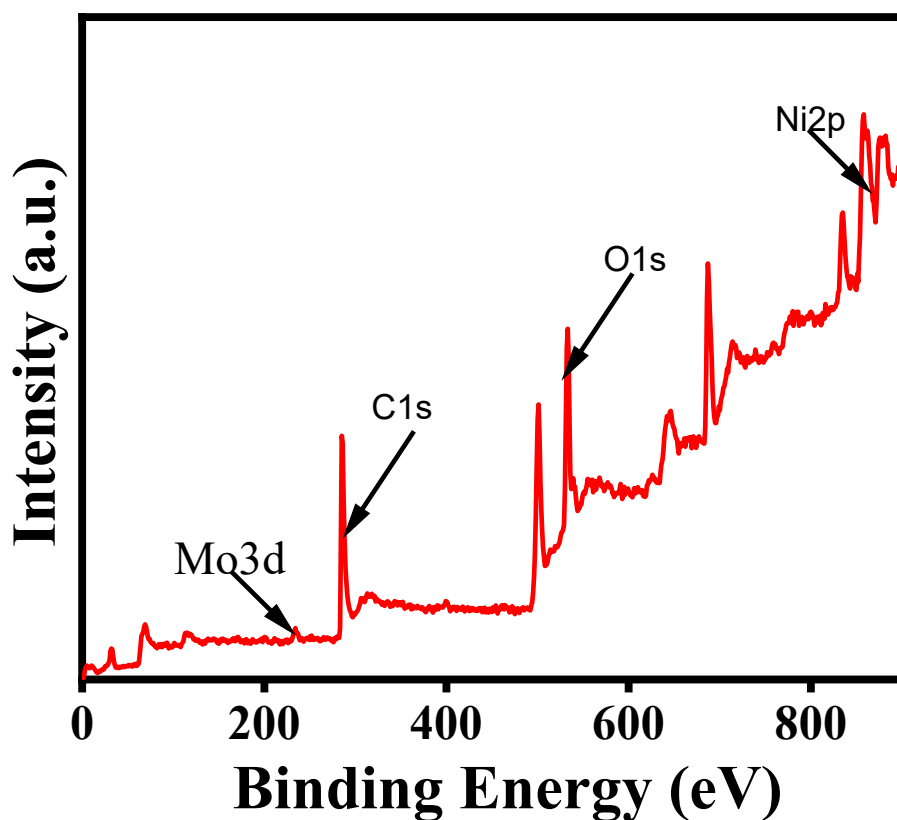

**Fig. S1.** XPS survey spectra of M2\_LA sample.

**Table. S2.** The atomic percentages of elements in M2\_LA

| Name  | Peak BE eV | FWHM eV | Area (P) CPS.eV | Atomic % |
|-------|------------|---------|-----------------|----------|
| O1s   | 532.92     | 4.19    | 321985.5        | 29.88    |
| C1s   | 285.89     | 3.72    | 250439.5        | 58.99    |
| Ni2p  | 858.11     | 9.86    | 657781.8        | 10.7     |
| Mo3p3 | 399.43     | 1.37    | 9771.27         | 0.31     |
| Mo3d3 | 233.73     | 0.35    | 2423.6          | 0.12     |

**Table. S3.** The ratio of Mo3d oxidation states in M2\_LA

| Name | Peak eV | BE eV | FWHM eV  | Area CPS.eV | (P) | Atomic % | Q | At. % | Std. dev. 1s |
|------|---------|-------|----------|-------------|-----|----------|---|-------|--------------|
| Mo+6 | 237.11  | 3.37  | 10219.73 | 46.28       | 1   | N/A      |   |       |              |
| Mo0  | 232.9   | 2.54  | 8816.27  | 53.72       | 1   | N/A      |   |       |              |

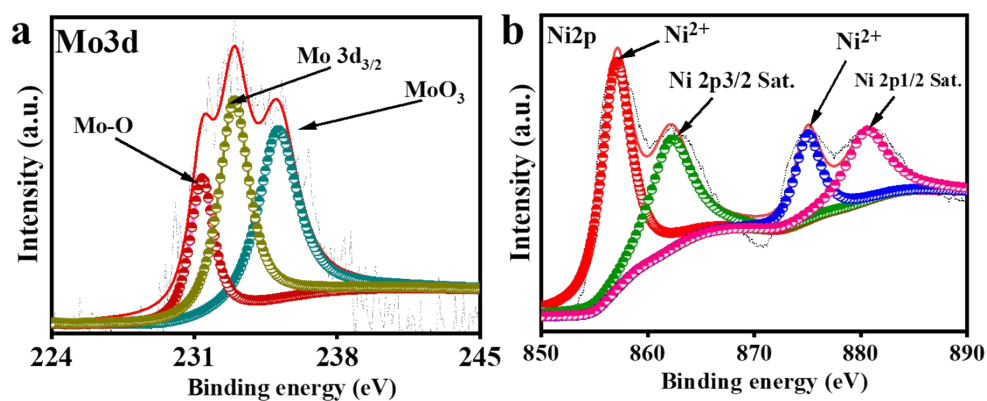

**Fig. S2.** High resolution XPS spectra of M2: (a) Mo3d and (b) Ni2p.

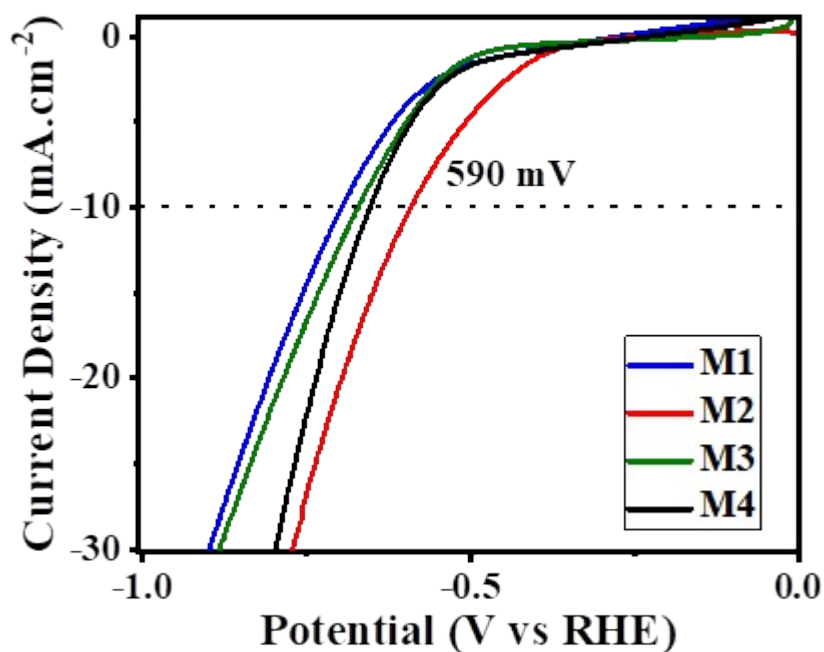

**Fig. S3** LSV polarization curves of M1, M2, M3 and M4 in alkaline sewage wastewater.

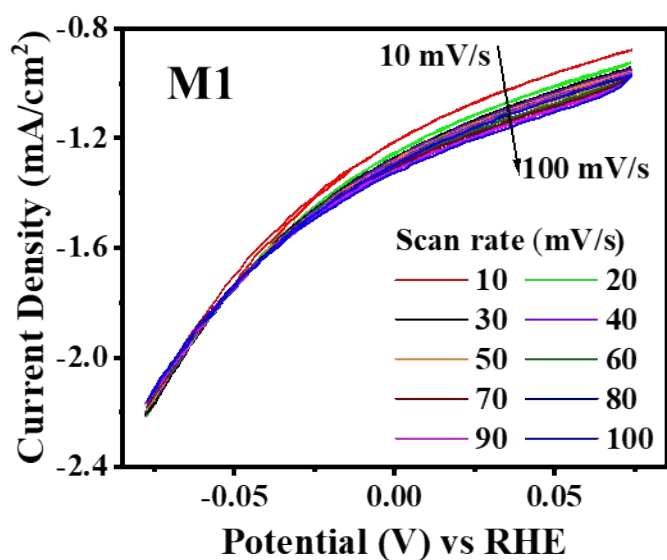

**Fig. S4.** CV analysis of M1 in neutral sewage at different scan rates for ECSA determination

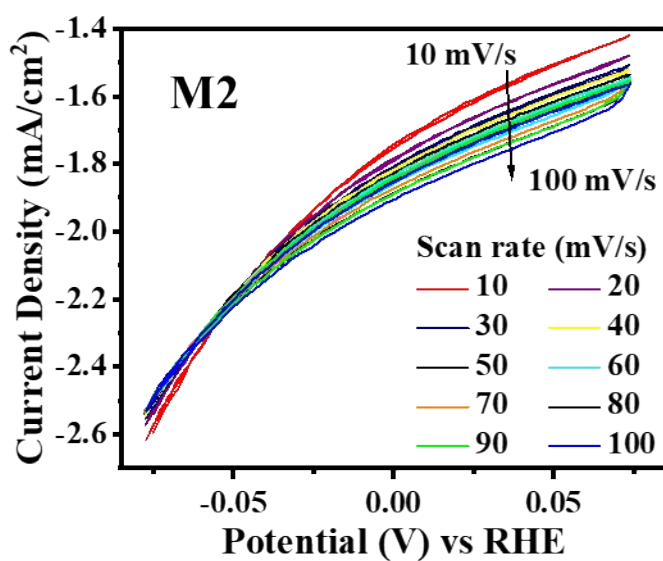

**Fig. S5.** CV analysis of M2 in neutral sewage wastewater at different scan rates for ECSA determination

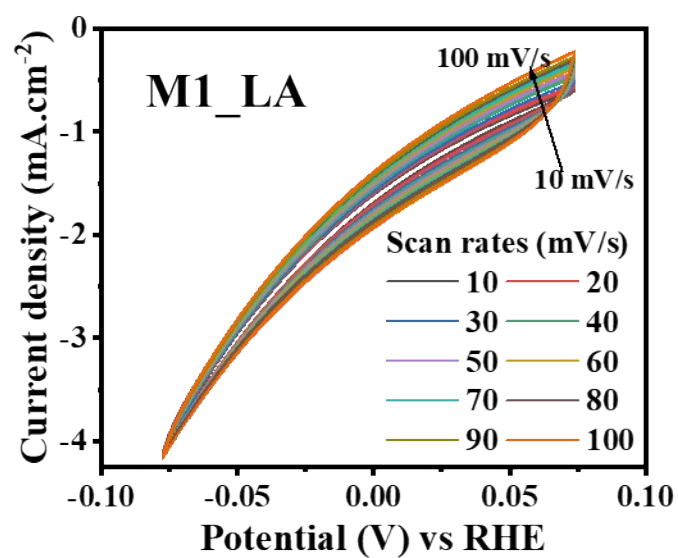

**Fig S6.** CV analysis of M1\_LA in neutral sewage wastewater at different scan rates for ECSA determination

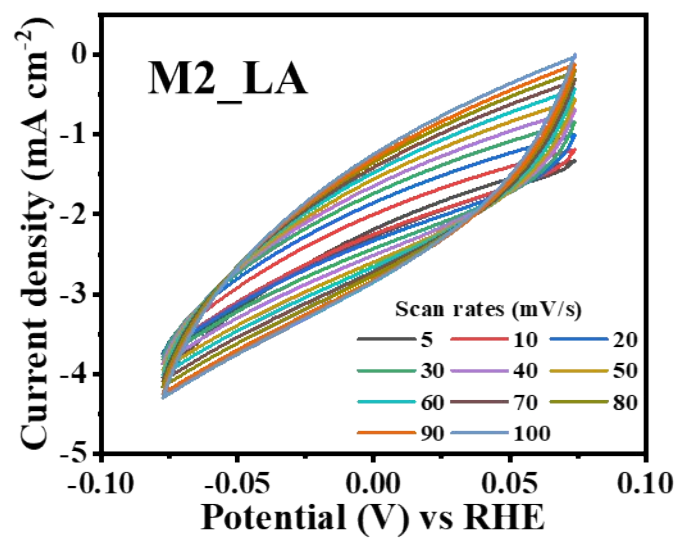

**Fig S7.** CV analysis of M2\_LA in neutral sewage wastewater at different scan rates for ECSA determination

**Table S4.** Calculated impedance values of the electrocatalysts obtained from the Randles circuit fitting.

| Sample | $R_{CT}$       | $R_s$          | CPE                 |
|--------|----------------|----------------|---------------------|
| M1     | 16.37 $\Omega$ | 24.63 $\Omega$ | 75.92 $\mu\text{F}$ |
| M2     | 11.40 $\Omega$ | 25.23 $\Omega$ | 74.76 $\mu\text{F}$ |
| M1_LA  | 9.10 $\Omega$  | 24.44 $\Omega$ | 109 $\mu\text{F}$   |
| M2_LA  | 5.87 $\Omega$  | 24.26 $\Omega$ | 3.41 mF             |

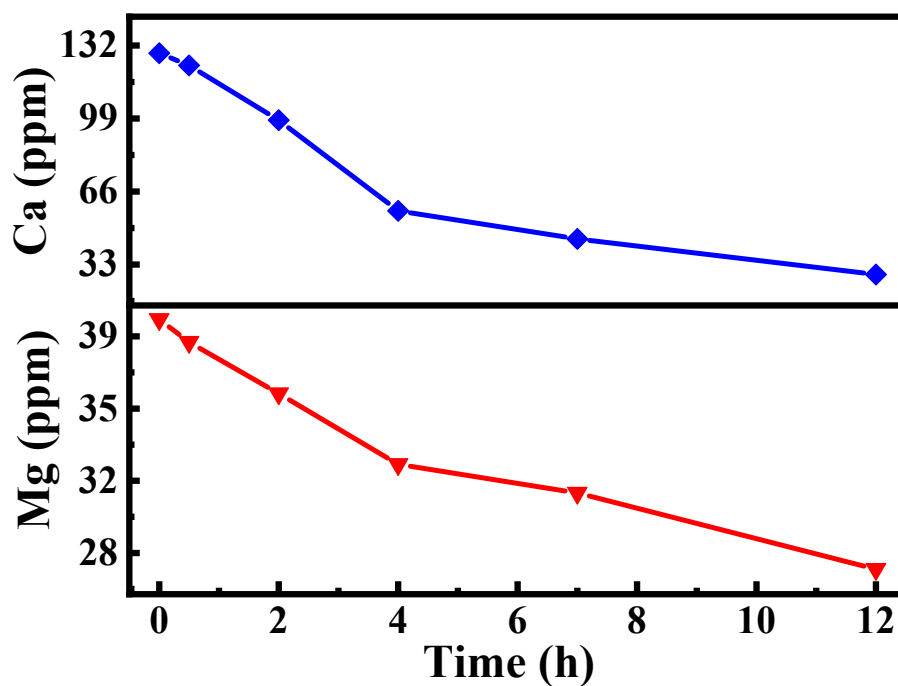

**Fig.S8.** ICPMS measurement of Ca and Mg content in the sewage electrolyte sample at different times.

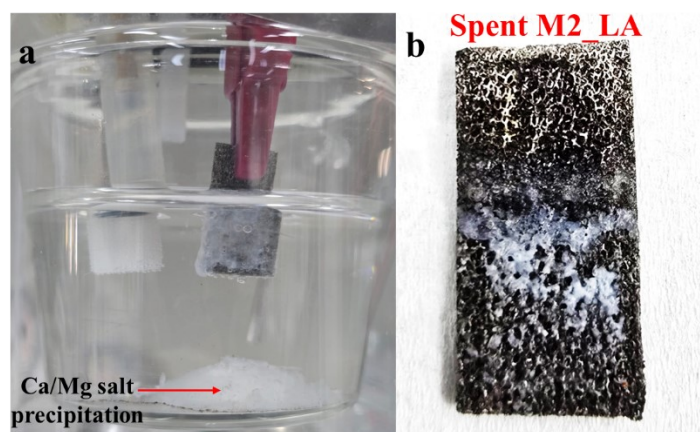

**Fig. S9.** Digital photographs of (a) HER-stability test in neutral sewage, and (b) spent M2\_LA after the stability test.

**Table S5.** Comparison of different Ni and Mo-based catalysts used in hybrid electrolyte systems

| S. No. | Electrocatalyst                                                      | Electrolyte System              | Overpotential                     | Ref.      |
|--------|----------------------------------------------------------------------|---------------------------------|-----------------------------------|-----------|
| 1      | Ni/MoN/NF                                                            | 5-hydroxymethylfurfuralin water | 53 mV at 10 mA cm <sup>-2</sup>   | [45]      |
| 2      | MoS <sub>2</sub> /rGO@MIL-53 (Ni)                                    | Textile Wastewater              | 67 mV at 10 mA cm <sup>-2</sup>   | [48]      |
| 3      | MoS <sub>2</sub> @MIL-53 (Ni)                                        | Textile wastewater              | 73 mV at 10 mA cm <sup>-2</sup>   | [47]      |
| 4      | NiMoSe/NF                                                            | Urea containing wastewater      | 300 mV at 100 mA cm <sup>-2</sup> | [46]      |
| 5      | MoO <sub>3</sub> /V <sub>2</sub> O <sub>5</sub> /Ni(OH) <sub>2</sub> | Urea containing wastewater      | 81 mV at 10 mA cm <sup>-2</sup>   | [49]      |
| 6      | M2_LA                                                                | Alkaline Sewage wastewater      | 132 mV at 10 mA cm <sup>-2</sup>  | This work |
| 7      | M2_LA                                                                | Neutral Sewage Wastewater       | 492 mV at 10 mA cm <sup>-2</sup>  | This work |

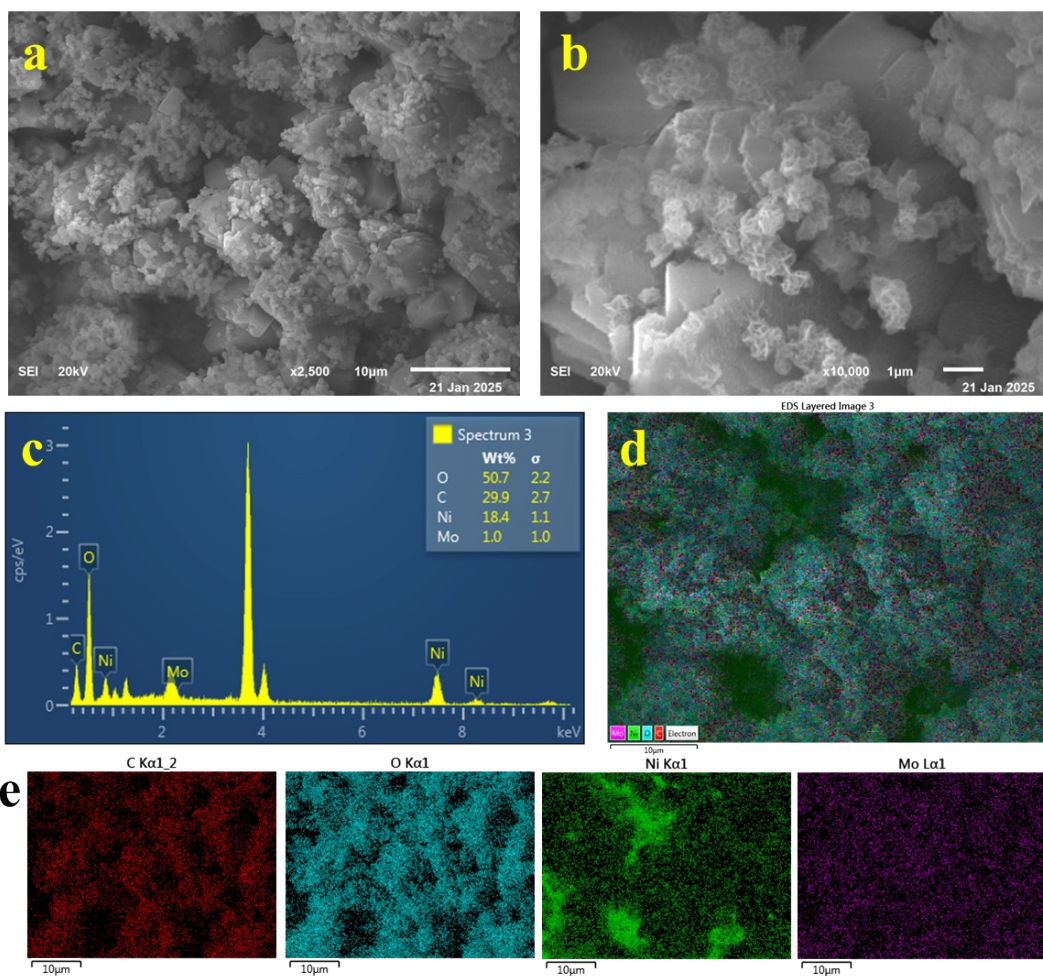

**Fig. S10.** (a) Low and (b) high magnification SEM images of spent M2\_LA. (c) EDX spectra and (d and e) mapping of spent M2\_LA indicating C, Ni, Mo and O.
